# Supplementary material for: Elevated Oxidative Stress Impairs Hematopoietic Progenitor Function in C57BL/6 Substrains
Source: PubMed Central journal article supplement — Stem Cell Reports. 2018 Jul 12;11(2):334–47. doi: 10.1016/j.stemcr.2018.06.011 (PMC6093083; doi:10.1016/j.stemcr.2018.06.011), 2018-07-12
Supplement: mmc1.pdf [file mmc1.pdf]

**Stem Cell Reports, Volume 11**

**Supplemental Information**

**Elevated Oxidative Stress Impairs Hematopoietic Progenitor Function  
in C57BL/6 Substrains**

**Antonio Morales-Hernández, Alice Martinat, Ashley Chabot, Guolian Kang, and Shannon McKinney-Freeman**

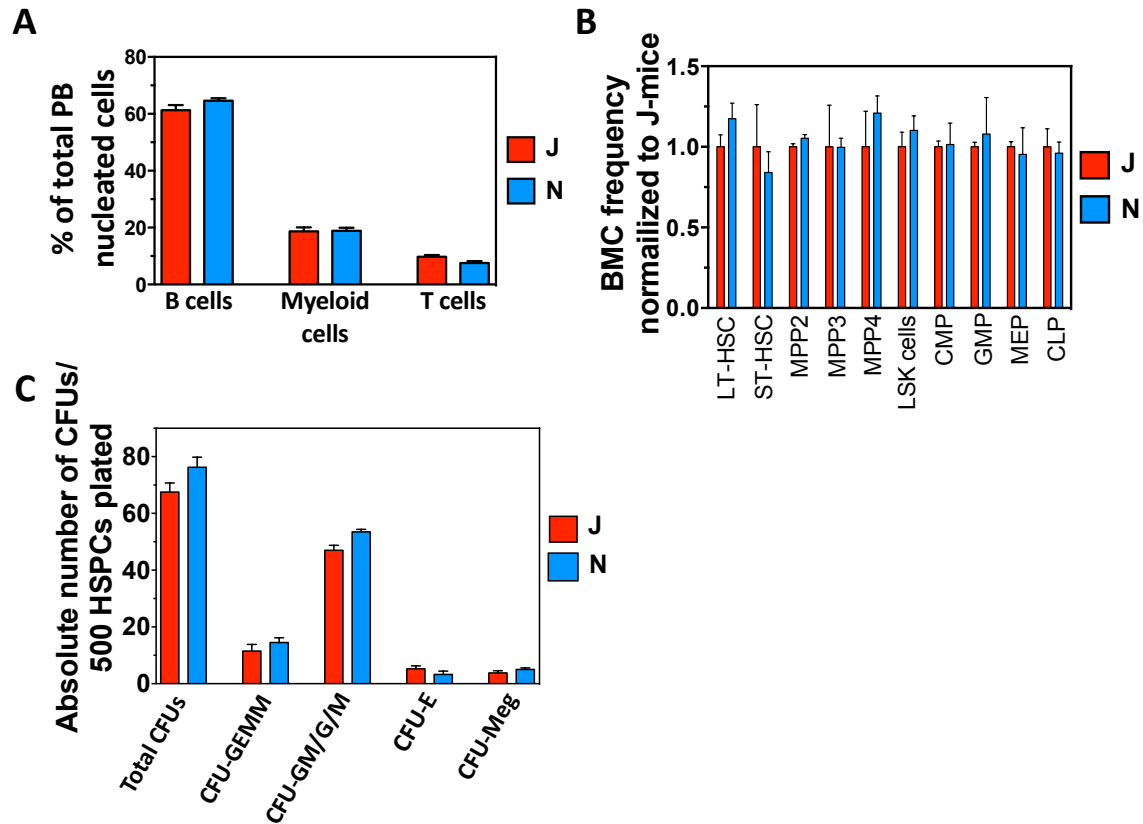

**Figure S1. N and J-mice display a similar hematopoietic system under homeostatic conditions.**

**A.** Percentage of myeloid (GR1+CD11B+) and lymphoid (B cells as B220+ and T cells as CD4+CD8+) lineage cells in the PB of N and J-mice. **B.** Absolute frequency of BMC (HSC-LT; HSC-ST; MPP; LSK cells; CMP; GMP; MEP; CLP) of N and J-mice. Data presented are normalized to the absolute levels in J-mice. **C.** LSK cells from N and J-mice were assayed for CFU potential. Data represented as mean  $\pm$  SEM.  $\geq$  4 mice were examined in A-C.

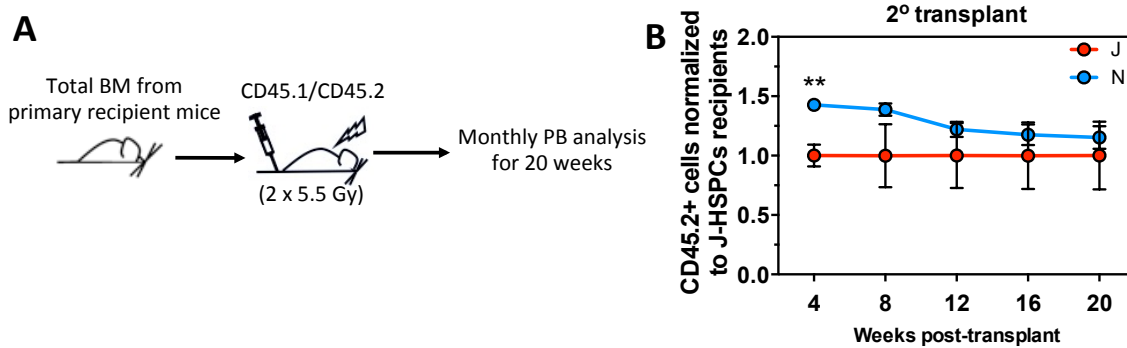

**Figure S2. J-BM cells display short-term repopulating defect in secondary transplants. Related to Figure 1.** **A.**  $10^6$  BM cells from primary transplant recipients were injected into lethally irradiated recipient mice (CD45.1/CD45.2). The PB of secondary recipients was examined every four weeks for 20 weeks post-transplant for CD45.2+ cells. **B.** Normalized CD45.2+ cells percentage in recipient mice PB after secondary transplant. Recipient mice CD45.2+ cells percentage was corrected to the original injected CD45.2+ cells percentage. Data presented are normalized to the CD45.2+ cells percentage observed in recipients of J-LSK cells. Data represented as mean  $\pm$  SEM. Donor mice  $N \geq 5$  per transplant. Recipient mice  $N \geq 5$  per transplant. \*\*  $p < 0.005$  significantly different to recipients of J-BM cells.

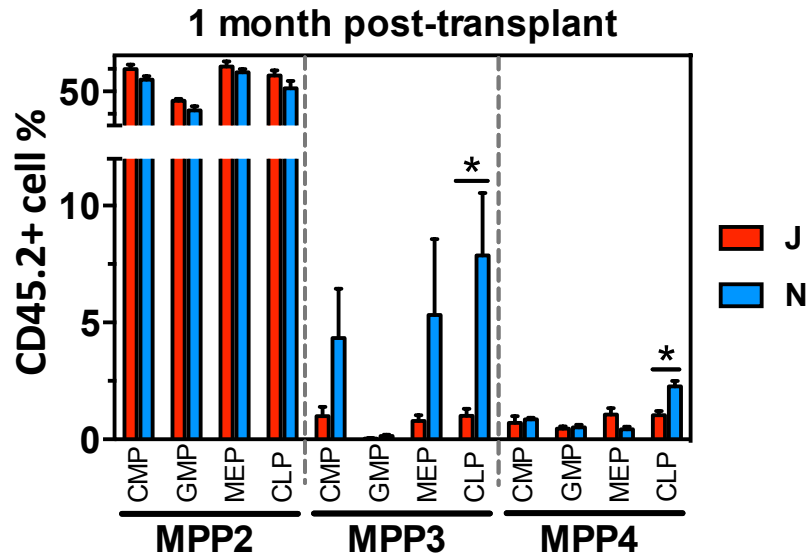

**Figure S3. J-MMP3 and MPP4 cells display a CLP repopulating defect compared with N-MPP3 and MPP4 cells. Related to Figure 3.** CD45.2+ MPP2, MPP3 or MPP4 cells from J or N mice were transplanted into sub-lethally irradiated recipients (CD45.1/CD45.2). Normalized CD45.2+ cells percentage of each BMC one month post-transplant. Data presented are normalized to the CD45.2+ cells percentage in J-mice. Data from two independent transplants represented as mean  $\pm$  SEM. Donor mice  $N \geq 3$  pooled per transplant. Recipient mice  $N \geq 5$  per transplant. \*  $p < 0.05$  significantly different to recipients of J-HSPCs.

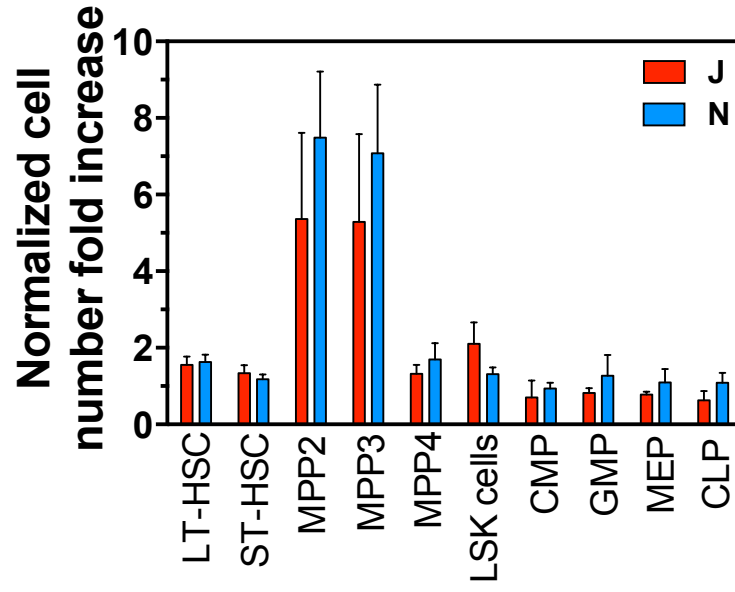

**Figure S4. Similarly elevated BMC numbers in pl:pC treated J and N-mice. Related to Figure 6.** 24 hours post-pl:pC injection, the absolute frequency of BMC (LT-HSC; ST-HSC; MPP; LSK cells; CMP; GMP; MEP; CLP) of N and J-mice was analyzed. The increase between control and pl:pC injected animals is shown. Data are presented as mean  $\pm$ SEM. N = 3.

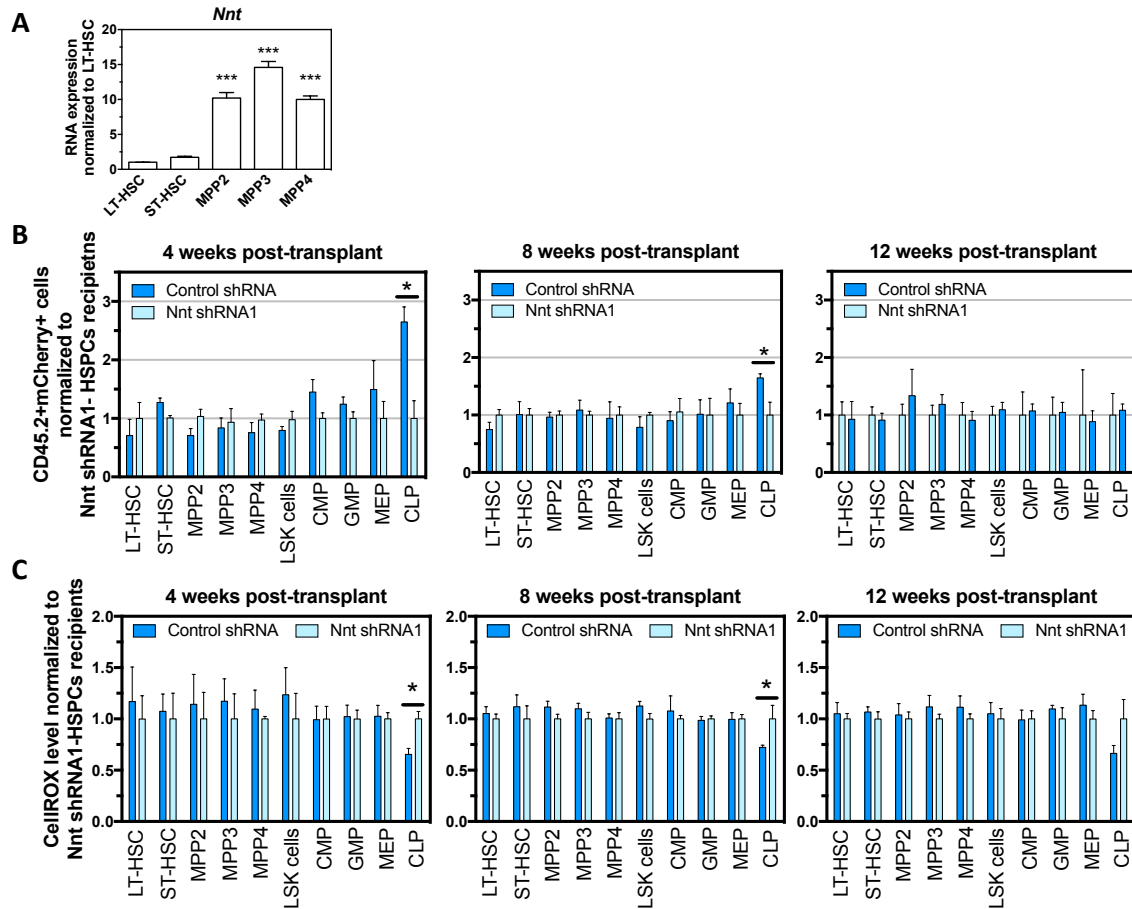

**Figure S5. N-HSPCs express *Nnt* at different levels and *Nnt* knockdown in N-HSPCs recapitulates J-HSPC short-term repopulating defect. Related to Figure 7. A.** LT-HSC, ST-HSC, MPP2, MPP3 and MPP4 were isolated from N-mice and *Nnt* expression was quantified by RT-qPCR. Data are presented as mean  $\pm$ SEM. N = 2. \*\*\*  $p < 0.001$  significantly different to LT-HSC. LSK cells isolated from N or J-mice (CD45.2+) were transduced with lentivirus containing control or *Nnt*-shRNAs. Transduced cells (i.e. mCherry+) were then isolated and transplanted with an equal number of competitor LSK cells (CD45.1+) into lethally irradiated recipients (CD45.2+/CD45.1+). The frequency (B) and ROS levels (C) of CD45.2+mCherry+ cells in the bone marrow of recipients was then analyzed by flow cytometry every four weeks for 12 weeks post-transplant. Data represented as mean  $\pm$ SEM. Donor mice N = 3 per transplant. Recipient mice N = 5 per transplant. \*  $p < 0.05$  significantly different to recipients of N-LSK cells transduced with *Nnt*-shRNA.

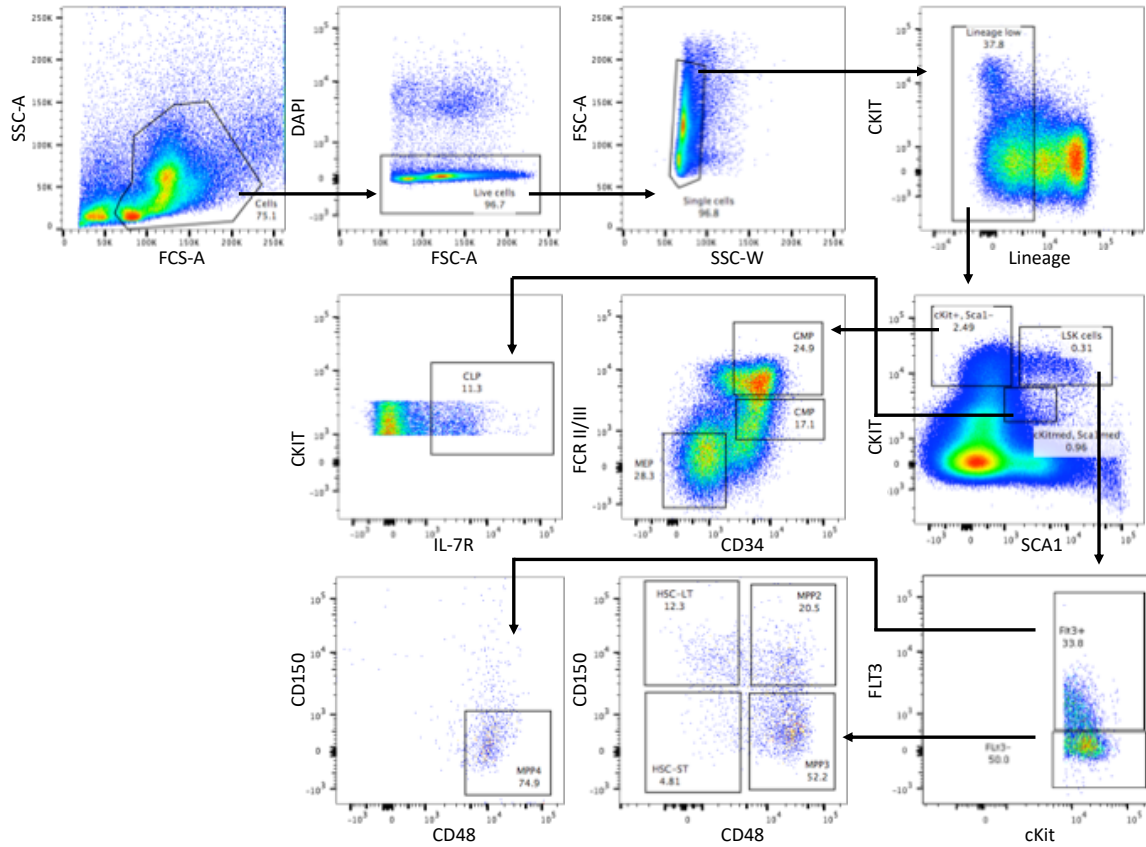

**Figure S6. BMC gating strategy.** Related to Figure 1-7, S1, S3, S4 and S5. Identification of each BMC according to their specific surface markers expression. LT-HSC (Lin<sup>-</sup>SCA1<sup>+</sup>CKIT<sup>+</sup>FLT3<sup>-</sup>CD150<sup>+</sup>CD48<sup>-</sup>); ST-HSC (Lin<sup>-</sup>SCA1<sup>+</sup>CKIT<sup>+</sup>FLT3<sup>-</sup>CD150<sup>-</sup>CD48<sup>-</sup>); MPP2 (Lin<sup>-</sup>Sca-1<sup>+</sup>c-Kit<sup>+</sup>Flt3<sup>-</sup>CD150<sup>+</sup>CD48<sup>+</sup>); MPP3 (Lin<sup>-</sup>SCA1<sup>+</sup>CKIT<sup>+</sup>FLT3<sup>-</sup>CD150<sup>-</sup>CD48<sup>+</sup>); MPP4 (Lin<sup>-</sup>SCA1<sup>+</sup>CKIT<sup>+</sup>FLT3<sup>-</sup>CD150<sup>-</sup>CD48<sup>+</sup>); CMP (Lin<sup>-</sup>SCA1<sup>-</sup>CKIT<sup>+</sup>CD34<sup>+</sup>FCR II/III<sup>med</sup>); GMP (Lin<sup>-</sup>SCA1<sup>-</sup>CKIT<sup>+</sup>CD34<sup>+</sup>FCR II/III<sup>high</sup>); MEP (Lin<sup>-</sup>SCA1<sup>-</sup>CKIT<sup>+</sup>CD34<sup>+</sup>FCR II/III<sup>low</sup>); CLP (Lin<sup>-</sup>SCA1<sup>med</sup>CKIT<sup>med</sup>IL-7R<sup>+</sup>).
